# Supplementary material
Source: HighWire-hosted journal article supplement (https://bibliotheek.ehb.be:2728/highwire/filestream/20926/field_highwire_adjunct_files/0/rapm-2022-104098supp001_data_supplement.pdf)
Supplement: rapm-2022-104098supp001_data_supplement.pdf [file rapm-2022-104098supp001_data_supplement.pdf]

**Supplemental Table 1. CPT Code Descriptions**

| CPT Codes | Descriptions                                                                                                                                                                                                                                                         |
|-----------|----------------------------------------------------------------------------------------------------------------------------------------------------------------------------------------------------------------------------------------------------------------------|
| 22102     | Partial Excision of Posterior Vertebral Component (e.g. Spinous Process, Lamina or Facet) for Intrinsic Bony Lesion, Single Vertebral Segment                                                                                                                        |
| 62380     | Endoscopic Decompression of the Spinal Cord or Nerve Roots at the Lumbar Level                                                                                                                                                                                       |
| 63005     | Laminectomy with Exploration and/or Decompression of Spinal Cord and/or Cauda Equina, without Facetectomy, Foraminotomy or Discectomy (e.g. Spinal Stenosis), 1 or 2 Vertebral Segments; Lumbar, except for Spondylolisthesis                                        |
| 63011     | Laminectomy with Exploration and/or Decompression of Spinal Cord and/or Cauda Equina, without Facetectomy, Foraminotomy or Discectomy (e.g. Spinal Stenosis), 1 or 2 Vertebral Segments; Sacral                                                                      |
| 63012     | Laminectomy with Removal of Abnormal Facets and/or Pars Inter-Articularis with Decompression of Cauda Equina and Nerve Roots for Spondylolisthesis, Lumbar (Gill Type Procedure)                                                                                     |
| 63017     | Laminectomy with Exploration and/or Decompression of Spinal Cord and/or Cauda Equina, without Facetectomy, Foraminotomy or Discectomy (e.g. Spinal Stenosis), more than 2 Vertebral Segments; Lumbar                                                                 |
| 63030     | Laminotomy (Hemilaminectomy), with Decompression of Nerve Root(s), Including Partial Facetectomy, Foraminotomy and/or Excision of Herniated Intervertebral Disc; 1 Interspace, Lumbar                                                                                |
| 63047     | Laminectomy, Facetectomy and Foraminotomy (Unilateral or Bilateral with Decompression of Spinal Cord, Cauda Equina and/or Nerve Root[s], [e.g. Spinal or Lateral Recess Stenosis]), Single Vertebral Segment; Lumbar                                                 |
| 63056     | Transpedicular Approach with Decompression of Spinal Cord, Equina and/or Nerve Root(s) (e.g. Herniated Intervertebral Disc), Single Segment                                                                                                                          |
| 63035     | Laminotomy (Hemilaminectomy), with Decompression of Nerve Root(s), Including Partial Facetectomy, Foraminotomy and/or Excision of Herniated Intervertebral Disc; Each Additional Interspace, Cervical or Lumbar                                                      |
| 63048     | Laminectomy, Facetectomy and Foraminotomy (Unilateral or Bilateral with Decompression of Spinal Cord, Cauda Equina and/or Nerve Root[S], [e.g. Spinal or Lateral Recess Stenosis]), Single Vertebral Segment; Each Additional Segment, Cervical, Thoracic, or Lumbar |
| 63057     | Transpedicular Approach with Decompression of Spinal Cord, Equina and/or Nerve Root(s) (e.g. Herniated Intervertebral Disc), Single Segment                                                                                                                          |
| 0275T     | Percutaneous Laminotomy/Laminectomy (Intralaminar Approach) for Decompression of Neural Elements                                                                                                                                                                     |
